# Supplementary material for: Microbiome-Gut-Brain-Axis communication influences metabolic switch in the mosquito Anopheles culicifacies
Source: bioRxiv or medRxiv preprint supplement (doi:10.1101/774430), 2020-10-08

## **Supporting Information**

### **Microbiome-Gut-Brain-Axis communications regulating metabolic switch in the mosquito *Anopheles culicifacies***

Tanwee Das De <sup>1§</sup>, Punita Sharma<sup>1§</sup>, Sanjay Tevatiya<sup>1</sup>, Charu Chauhan<sup>1</sup>, Seena Kumari<sup>1</sup>, Deepak Singla<sup>1,2</sup>, Vartika Srivastava<sup>1</sup>, Jyoti Rani<sup>1</sup>, Yasha Hasija<sup>3</sup>, Kailash C Pandey<sup>1</sup> and Rajnikant Dixit <sup>1\*</sup>.

<sup>1</sup>Laboratory of Host-Parasite Interaction Studies, National Institute of Malaria Research, Sector-8, Dwarka, Delhi 110077, India.

<sup>2</sup> School of Agricultural Biotechnology, Punjab Agricultural University, Ludhiana, Panjab, India.

<sup>3</sup> Department of Biotechnology, Delhi Technological University. Shahbad Daultapur, Main Bawana Road, Delhi-110042, India

\$ Authors equally contributed

\*Author for correspondence (dixitrk@mrcindia.org)

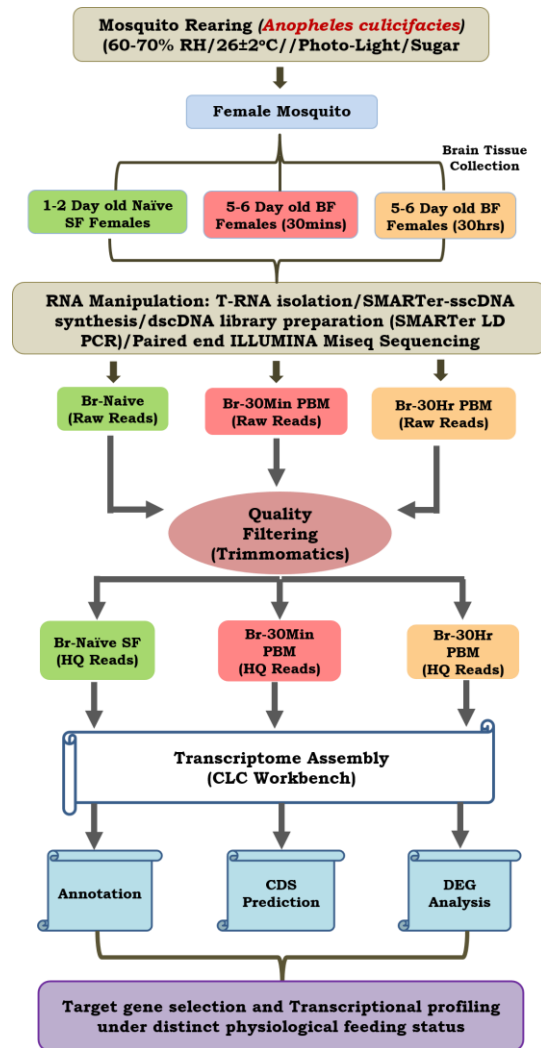

**Fig. S1:** A technical overview to decode the hard-wired genetic structure of brain system of *Anopheles culicifacies* mosquito.

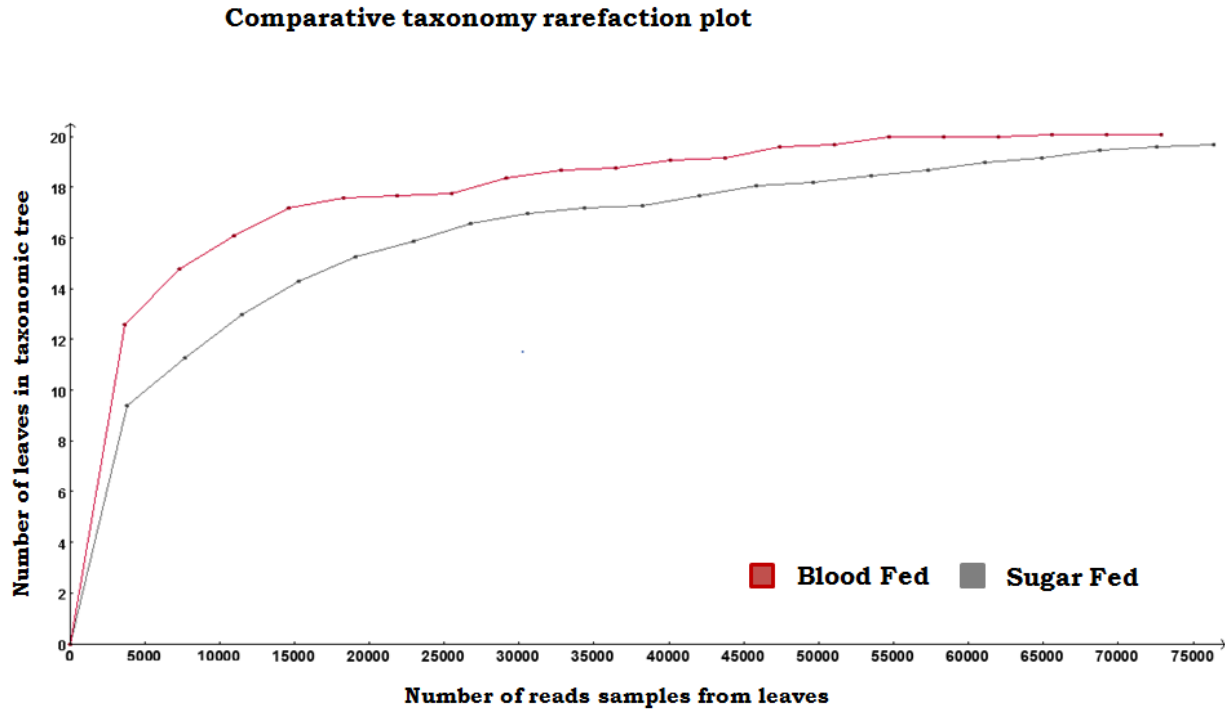

**Figure S2:** Rarefaction curve plot showing alpha diversity for the sugar fed (Gray line) and blood fed (Red line) at family level

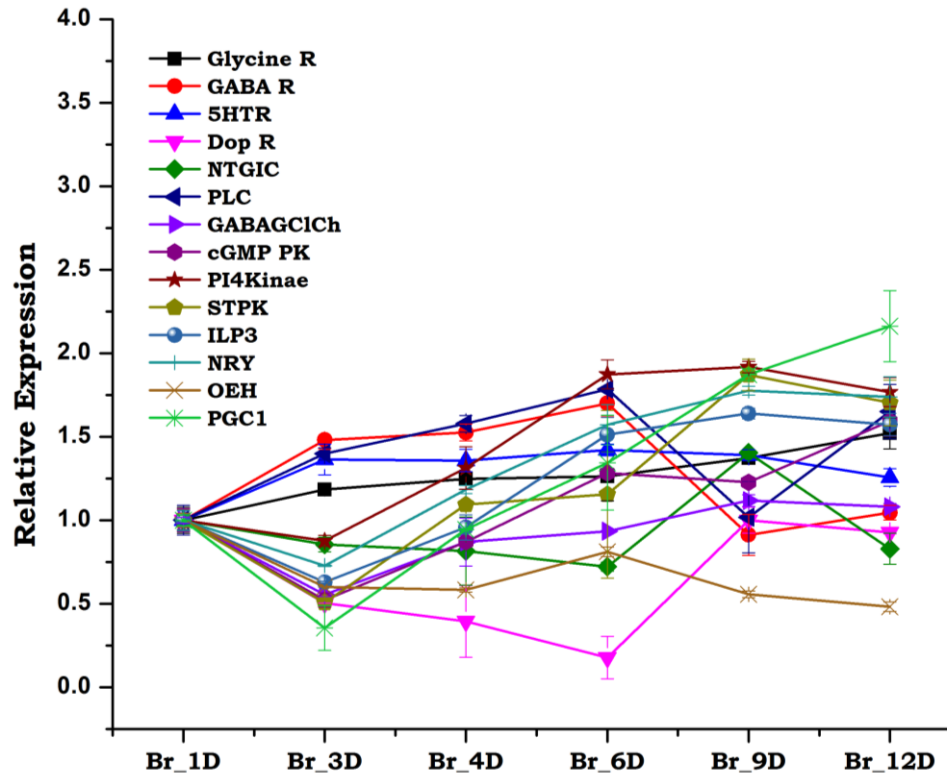

**Fig. S3:** Differential gene expression analysis in aging non-blood fed female mosquito brain. No significant modulation of neuronal genes was observed when compared to 0-1-day old teneral mosquitoes with 12 day-old non-blood fed mosquitoes. Statistical analysis using two-way ANOVA followed by Tukey Test has implied at 0.05 level, the expression pattern of the respective genes was not statistically significant in aging mosquitoes ( $n = 25$ ,  $N = 3$ ).

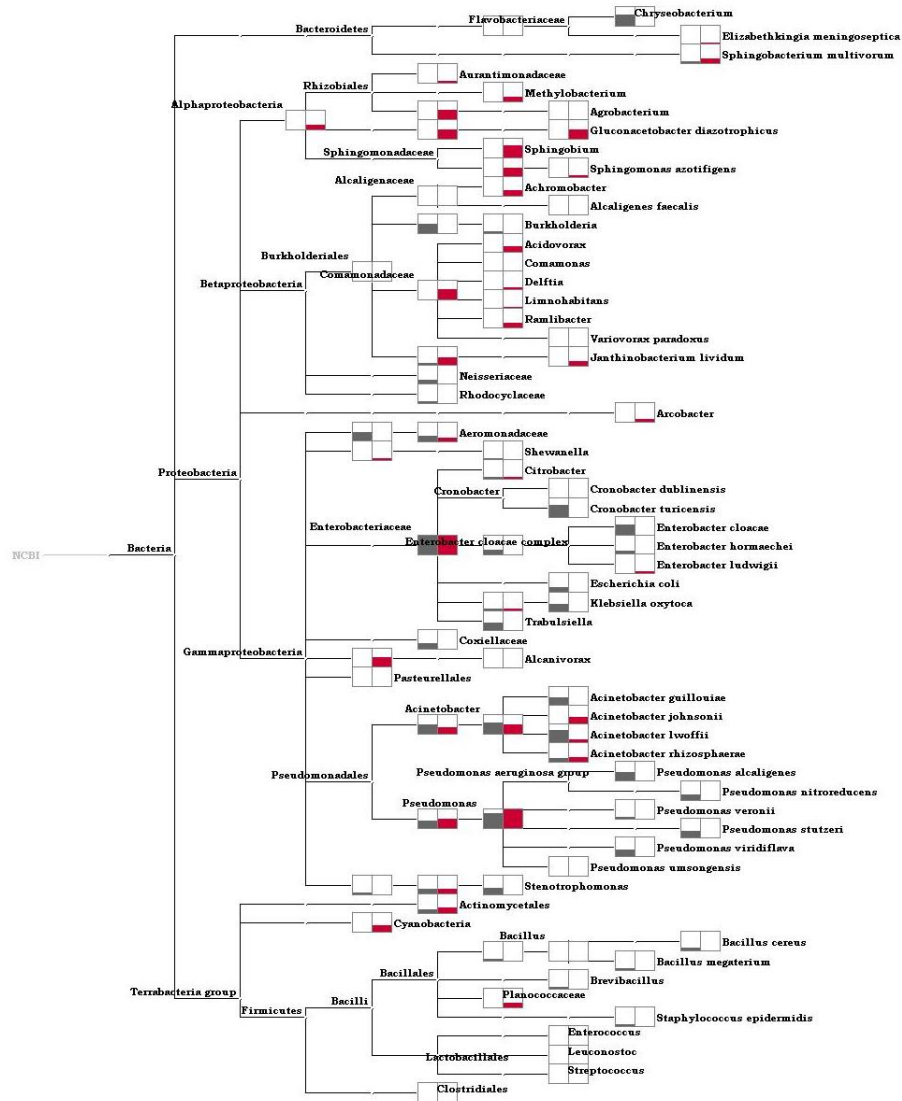

**Figure S4a:** Heat map of the comparative sugar fed (Gray bar) and blood fed (Red bar) midgut metagenomic data showing values at log scale for species level

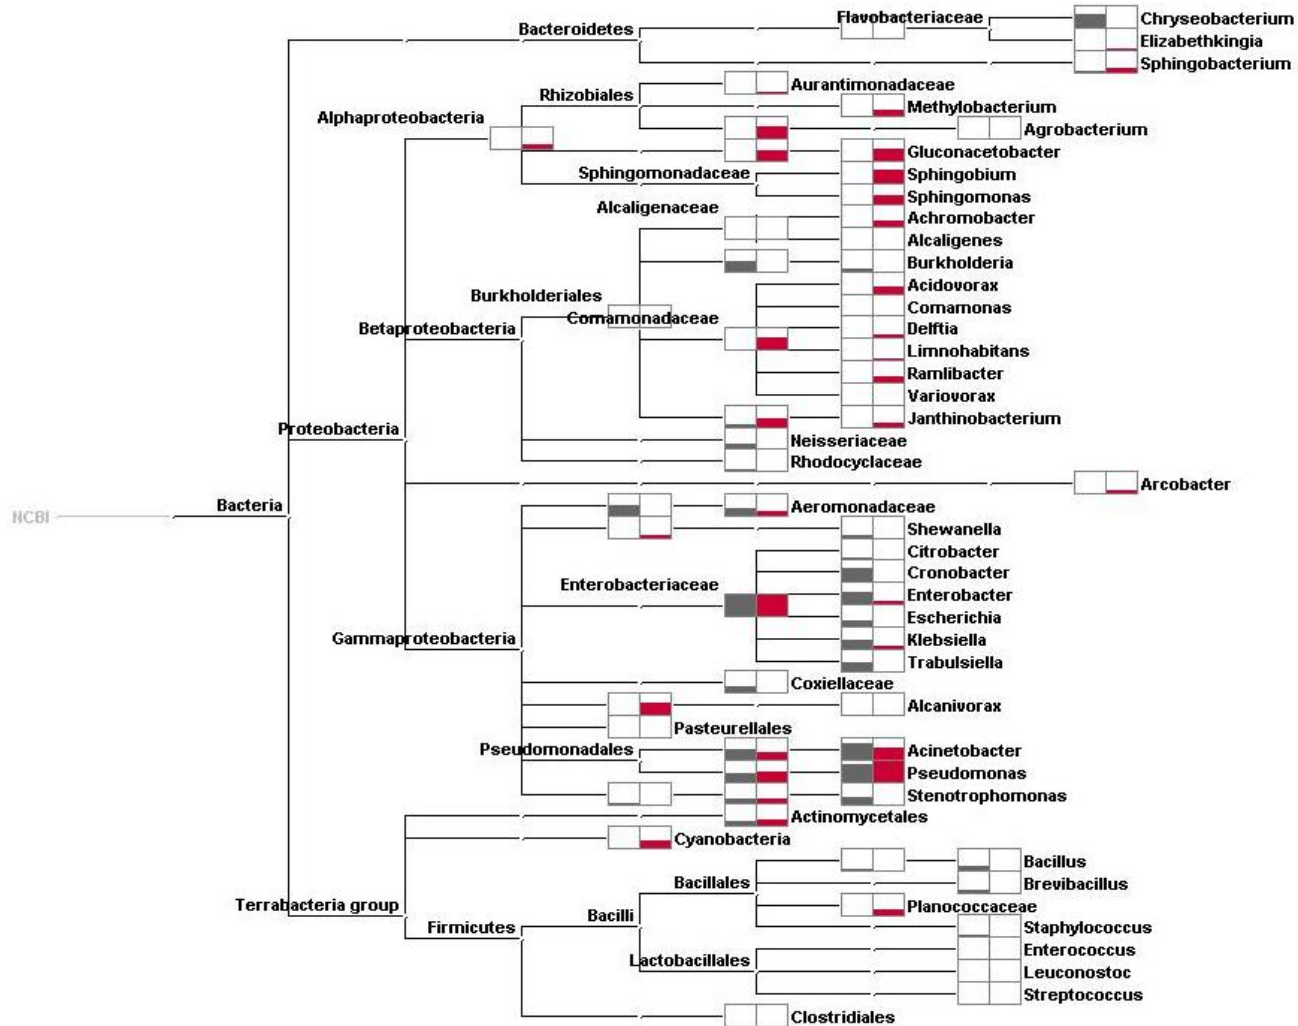

**Figure S4b:** Heat map of the comparative sugar fed (Gray bar) and blood fed (Red bar) midgut metagenomic data showing values at log scale for genus level

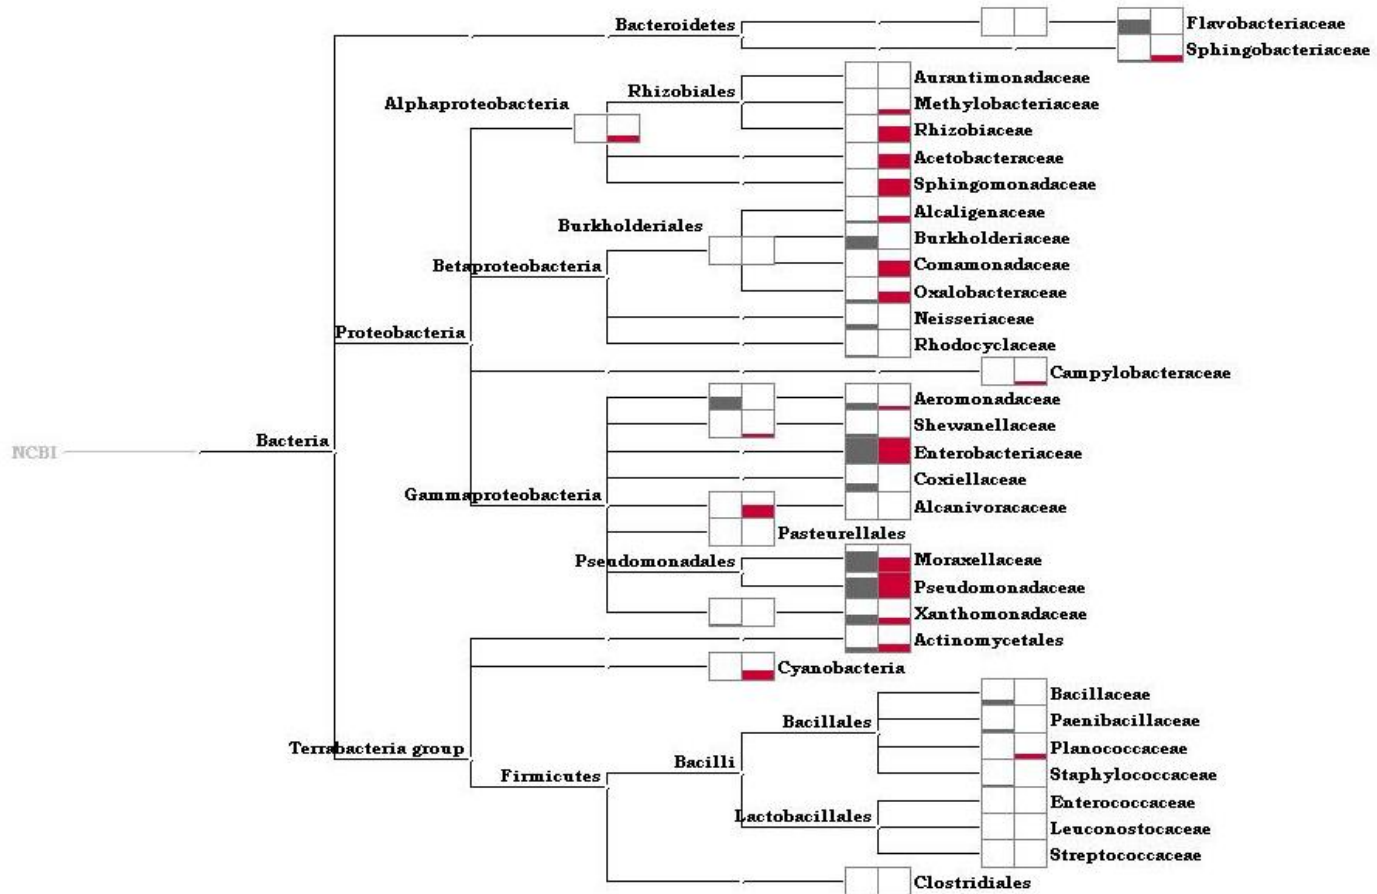

**Figure S4c:** Heat map of the comparative sugar fed (Gray bar) and blood fed (Red bar) midgut metagenomic data showing values at log scale for family level

(a)

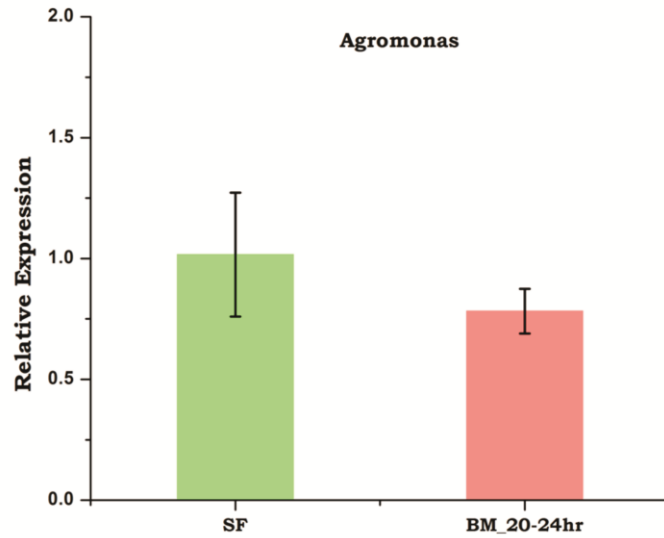

(b)

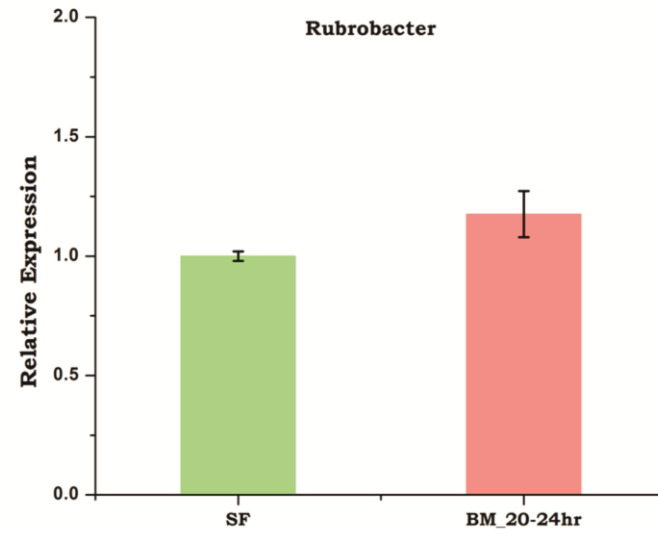

**Figure S5:** Relative expression of *Agromonas* and *Rubrobacter* (gram positive bacteria) at Sugar fed and 20-24hr Post blood fed condition shows no significant change during the two feeding status



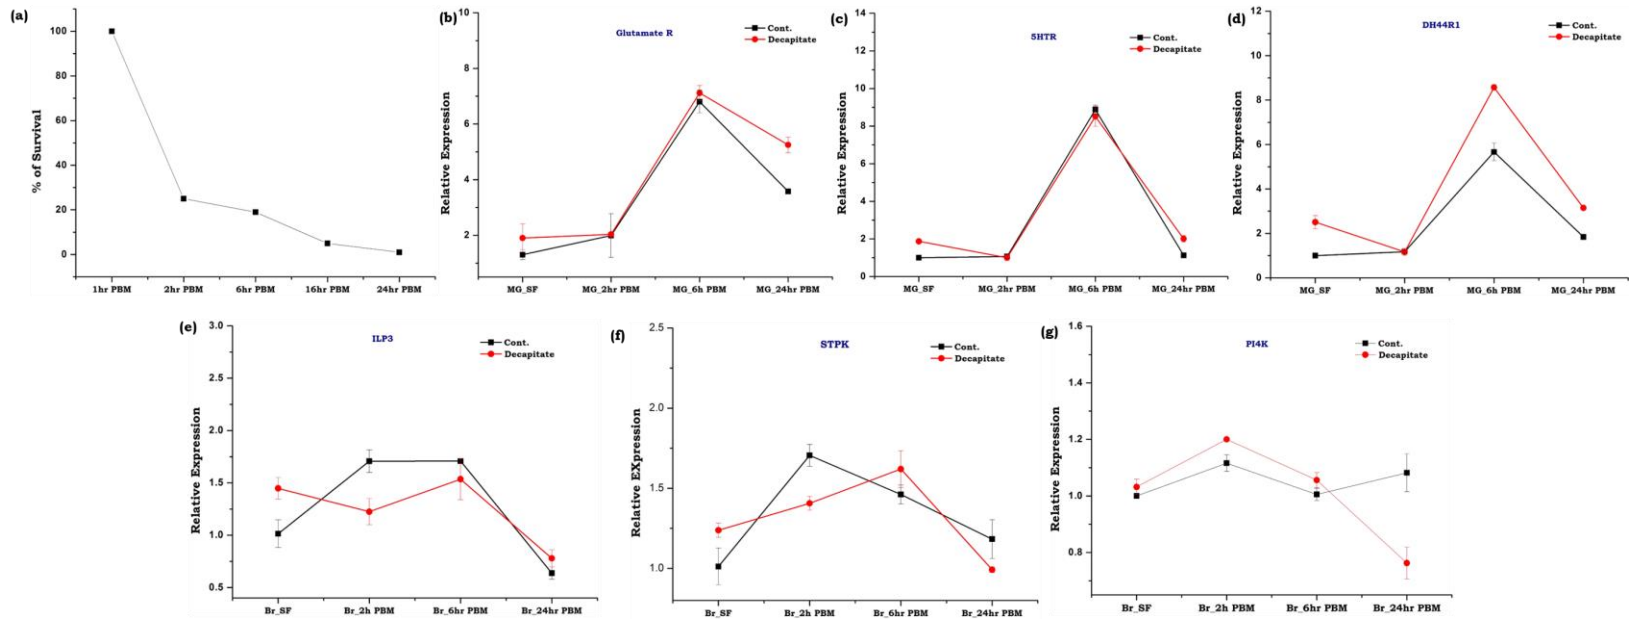

**Fig. S6: Transcriptional Response of neuromodulator receptor genes in naïve and decapitated blood-fed female *An. culicifacies* mosquitoes.** (a) Percentage of mosquitoes that survived till 24 h after decapitation which was performed after 1h of blood-feeding. 5-6 days old sugar-fed mosquitoes were provided blood meal and mosquitoes heads were decapitated after 1 h. from the full-fed gravid females. After that, the decapitated mosquitoes were kept in a cage for recovery and count the live (mosquitoes that vibrate/move their legs or other body parts are considered as live) and dead mosquitoes (non-movable mosquitoes with visible shrinkage of the body parts at the respective time points are considered as dead) at different time points until we observed 100% mortality. The percentage of survival was calculated until 24h after blood feeding. (b-d) Relative gene expression analysis of neuromodulator receptor genes in the gut of blood-fed and decapitated female mosquitoes. (e-g) Relative gene expression analysis of neuromodulator receptor genes in the gut of blood-fed and decapitated female mosquitoes. Statistical analysis using two-way ANOVA implied that at 0.05 level the expression level the respective genes in control and decapitated females are not statistically different.

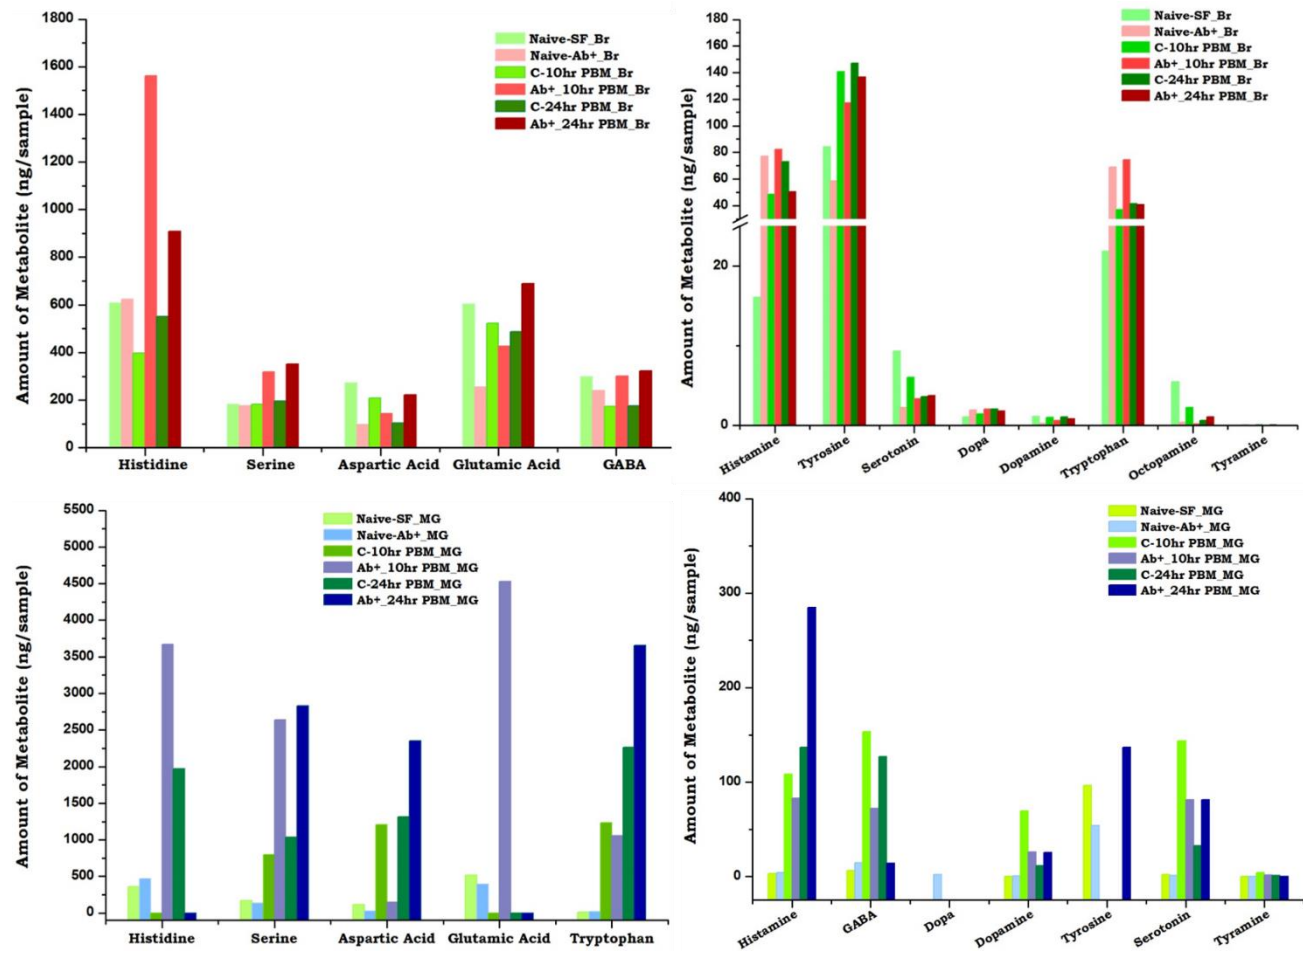

**Fig. S7:** Neurotransmitters dynamics of naive and aseptically reared mosquitoes collected from sugar fed and blood fed conditions

**Table S1: List of Primer Sequence used in the study**

| <b>Sl. No.</b> | <b>Primer Name and Sequence</b>                                                                                    |
|----------------|--------------------------------------------------------------------------------------------------------------------|
| <b>1.</b>      | Actin_Fw: 5' TGCCTGACATCAAGGAGAAG 3'<br>Actin_Rev: 5' GATTCCATACCCAGGAACGA 3'                                      |
| <b>2.</b>      | Ac_PyruvateKinase_Fw: 5' CGCACTTGATCTCCAAGTAT 3'<br>Ac_PyruvateKinase_Rev: 5' TTCCAGCCAGTAACAACAA 3'               |
| <b>3.</b>      | Ac_Solute Carrier 7_Fw: 5' TCAATAGCTCCGAAATCAGT 3'<br>Ac_Solute Carrier 7_Rev: 5' TGATAACGAACAGCAAGACA 3'          |
| <b>4.</b>      | Ac_AATransporter_Fw: 5' CAATGCCTATGGTTACAGGT 3'<br>Ac_AATransporter_Rev: 5' GCTGGTAAGTGTCCTTCTTG 3'                |
| <b>5.</b>      | Ac_TrehalaseTransporter_Fw: 5' CGATGGGACTGTA CT TCTTC 3'<br>Ac_TrehalaseTransporter_Rev: 5' GTCTAGATCGGCGAAAAAC 3' |
| <b>6.</b>      | Ac_PGC1_Fw: 5' ACCTTACGGTAAAATCGTCA 3'<br>Ac_PGC1_Rev: 5' GTACGGTAGCTGATGTTCGT 3'                                  |
| <b>7.</b>      | Ac_OxoglutarateDHS_Fw: 5' GCAACTACTTCCATCTGCTC 3'<br>Ac_OxoglutarateDHS_Rev: 5' GAGCCTTCAACAAGTCGTAA 3'            |
| <b>8.</b>      | cGMP PK_Fw: 5' GCGTTTGATTATCTGCACTC 3'<br>cGMP PK_Rev: 5' AAGGACTCCAAGTGACCAGT 3'                                  |

|            |                                                                                                          |
|------------|----------------------------------------------------------------------------------------------------------|
| <b>9.</b>  | GlutamateR_Fw: 5'AGTGGTATCAACGCAGAGTG 3'<br>GlutamateR_Rev: 5' GAGTTTAAGCACTGCTCCAC 3'                   |
| <b>10.</b> | Glycine R_Fw: 5' GATACTGCCACTACCTCGTC 3'<br>Glycine R_Rev: 5' CTTGGAGACCGAATTGAATC 3'                    |
| <b>11.</b> | GABA R_Fw: 5' CAGAACGAAGAAGGCTACTC 3'<br>GABA R_Rev: 5' AGTATCCACGCATACTCAGC 3'                          |
| <b>12.</b> | ARMAA_Decarboxylase_Fw: 5'GGTAACCAAGTCCTTCAGTG 3'<br>ARMAA_Decarboxylase_Rev: 5' TAGAACAGACGACCTCGAAC 3' |
| <b>13.</b> | ILP1_Fw: TCCACTACATGGAAAACCTCC<br>ILP1_Rev: GTCATCAGTGCCTGGTAGAT                                         |
| <b>14.</b> | ILP3_Fw: TAGCAATGATGAGTGGATGA<br>ILP3_Rev: ACAACACTCCTCTACGATGC                                          |
| <b>15.</b> | Leukokinin_Fw: AAACATCGCATAGCAGAGAT<br>Leukokinin_rev: TCAGATAATCCTGCACCATA                              |
| <b>16.</b> | NRY_Fw: TACTGTACGGCTGGTTGAAT<br>NRY_Rev: TTAGTTCCGGCAGTGTTT                                              |
| <b>17.</b> | OEH_Fw: GACAAGAATGCGGTGATAAT<br>OEH_Rev: CGTTGCTGTAGTAATCGAAG                                            |
| <b>18.</b> | DH44R1_Fw: CTCGAAATAGAATGCTCCTG<br>DH44R1_Rev: AGATGACGATGAGGTAGGTG                                      |

|            |                                                                                       |
|------------|---------------------------------------------------------------------------------------|
| <b>19.</b> | LKR_Fw: AAGAGGGAACACGACAAAC<br>LKR_Rev: GCTCGATATAATTGGTGGTC                          |
| <b>20.</b> | DH44_Fw: AACGAACAGGAAGATCTCAA<br>DH44_Rev: ATACCGTAGACGTACCGTGA                       |
| <b>21.</b> | CCHAR2_Fw: CCACTCCGAAAACACTACAGAC<br>CCHAR2_Rev: GTGGCAGGAAGTAGTAAACG                 |
| <b>22.</b> | V-Type ATPase_Fw: TTACATGTACACCGATTTGG<br>V-Type ATPase_Rev: GACTTCATCAGACGTGACAG     |
| <b>23.</b> | DopR_Fw:5' GTTATGGGCGTGTTTATTGT 3'<br>DopR_Rev:5' GCTGGTACTTGCGTCTTATC 3'             |
| <b>24.</b> | AKT Kinase_Fw: GATGGAGGAGGTAAAGTTCC<br>AKT Kinase_Rev: GAACTCACGGTCGAAGTAAC           |
| <b>25.</b> | CYP314A1_Fw: GAGATTGCGCAAGAATTTAG<br>CYP314A1_Rev: GGAAGTTGTCCTCACTCTGA               |
| <b>26.</b> | PTTH_Fw: CTTCACCTCTGAATTGCTTC<br>PTTH_Rev: ACAAGAAGACGGGTTACTGTG                      |
| <b>27.</b> | KDNaCaExchanger_Fw: GTGAGATGGGTATCAGCAAC<br>KDNaCaExchanger_Rev: CTTCCAATCAAGTTTGAAGC |

|            |                                                                                                           |
|------------|-----------------------------------------------------------------------------------------------------------|
| <b>28.</b> | GABA ClCh_Fw: 5' GGAAGGTGTTTGGTAAGTCA 3'<br>GABA ClCh_Rev: 5' GGTGATCGTGTTTCGAGTAAT 3'                    |
| <b>29.</b> | PLC_Fw: 5' TGGATTCGTCCAACACTATCAT 3'<br>PLC_Rev: 5' TTCACGATCACCTCGTTC 3'                                 |
| <b>30.</b> | PI-4Kinase_Fw: 5' ACATCATCTCCTCACTGTCC 3'<br>PI-4Kinase_Rev: 5'GTGTGCCACTGTTGTAATCA 3'                    |
| <b>31.</b> | ST ProteinKinase_Fw: 5'TTTATAGTGCCGTGTGTTGA 3'<br>ST ProteinKinase_Rev: 5'CTTAATGTGGAACCGATCAT 3'         |
| <b>32.</b> | Trehalase_Fw: 5' GAAGAGGACAAACAGGACTA 3'<br>Trehalase_Rev: 5' GTTCCGGTAACCATAGAAC 3'                      |
| <b>33.</b> | 5-HT Receptor_Fw: 5' ATGATCTCGCGTAACTCCTC 3'<br>5-HT Receptor_Rev: 5' ATCGGATTGACCAGACTGC 3'              |
| <b>34.</b> | TOR_Fw: GTAGAATGTTGGTGGTCGAT<br>TOR_Rev: ACCATCTGCTAGGTTATTGC                                             |
| <b>35.</b> | Octopamine Receptor_Fw: 5'CTACTGGCGGATCTATCGGG 3'<br>Octopamine Receptor_Rev: 5' TGGTGGAAAGGCTGTGTTTTG 3' |
| <b>36.</b> | Calcitonin R_Fw: AATAGAATGCTGGATGAACG<br>Calcitonin R_Rev: GGACGAAACGGTGTAAGTAT                           |

|            |                                                                                                   |
|------------|---------------------------------------------------------------------------------------------------|
| <b>37.</b> | NTGated IonCh_Fw: 5' ACGTTTCGAAAGTCAAACAC 3'<br><br>NTGated IonCh_Rev: 5' GCTGTAGAATGCACAAATGA 3' |
|------------|---------------------------------------------------------------------------------------------------|

**Table S2: Comparative alpha diversity indices estimation of gut-bacterial population of naïve sugar fed and blood fed mosquito *An. culicifacies***

| Sample   | Taxonomy Rank: Class |               |
|----------|----------------------|---------------|
|          | Shannon index        | Simpson index |
| Ac_SF_MG | 0.088                | 1.019         |
| Ac_BF_MG | 0.225                | 1.063         |

**Table S3a: Annotation kinetics of RNA-Seq data**

| <b>Molecular Features</b>        | <b>Ac-Br-Naive</b> | <b>Ac-Br-30M PBM</b> | <b>Ac-Br-30Hr PBM</b> |
|----------------------------------|--------------------|----------------------|-----------------------|
| <b>Total No. of Raw Reads</b>    | 5268211            | 3947521              | 3760078               |
| <b>Total No. of Contigs</b>      | 32118              | 32984                | 38512                 |
| <b>Total Transcripts</b>         | 9460               | 9146                 | 7387                  |
| <b>Total BLASTx hits (NR)</b>    | 8,668 (~91%)       | 8,336 (~91%)         | 6,548 (~88%)          |
| <b>Transcripts with GO Match</b> |                    |                      |                       |
| <b>Molecular Function</b>        | 4773               | 4556                 | 3575                  |
| <b>Biological process</b>        | 4446               | 4299                 | 3381                  |
| <b>Cellular component</b>        | 2523               | 2424                 | 1888                  |

**Table S3b: Percentage of differentially expressed transcripts**

| <b>Sample</b>              | <b>No. of Transcripts</b> | <b>Transcripts showing Differential gene Expression (DGE)</b> | <b>Upregulated Transcripts</b> | <b>Downregulated Transcripts</b> | <b>Percentage of Transcripts showing DGE</b> |
|----------------------------|---------------------------|---------------------------------------------------------------|--------------------------------|----------------------------------|----------------------------------------------|
| Ac_Br_naive vs Ac_Br_30min | (9460 + 9146) = 18606     | Total - 4747<br>Significant – 3183<br>Not significant - 1564  | 622 (3%)                       | 2110 (11%)                       | 14% CDS show differential expression         |
| Ac_Br_Naive vs Ac_Br_30hr  | (9460 + 7387) = 16847     | Total -3966<br>Significant – 3174<br>Not significant - 792    | 482 (2%)                       | 2469 (14%)                       | 16 % show differential expression            |



**Table S4: Quantitative estimation of 13 different neurotransmitters in the brain and the gut of mosquitoes under different physiological conditions.**

| Name of NT           | Control SF_Br | Ab+ SF BR | Control SF_MG | Ab+ SF _MG | 10hr PBM_Br | Ab+ 10hr PBM_Br | 10hr PBM_MG | Ab+ 10hr PBM_MG | 24hr PBM_Br | Ab+ 24hr PBM_Br | 24hr PBM_MG | Ab+ 24hr PBM_MG |
|----------------------|---------------|-----------|---------------|------------|-------------|-----------------|-------------|-----------------|-------------|-----------------|-------------|-----------------|
| <b>Histidine</b>     | 607.77        | 622.52    | 356.52        | 469.70     | 397.58      | 1562.75         | DC          | 3672.30         | 550.28      | 908.02          | 1968.73     | DC              |
| <b>Serine</b>        | 182.75        | 176.07    | 167.62        | 134.24     | 182.04      | 318.04          | 798.51      | 2636.08         | 197.18      | 350.75          | 1034.20     | 2830.31         |
| <b>Histamine</b>     | 16.08         | 76.89     | 3.35          | 3.83       | 48.28       | 82.21           | 108.12      | 83.16           | 73.12       | 50.42           | 136.69      | 284.97          |
| <b>Aspartic Acid</b> | 272.35        | 96.74     | 115.69        | 24.02      | 209.89      | 143.05          | 1205.17     | 146.59          | 102.76      | 222.80          | 1312.08     | 2348.14         |
| <b>Glutamic Acid</b> | 604.78        | 255.68    | 513.97        | 397.82     | 523.25      | 425.24          | DC          | 4530.44         | 486.92      | 690.13          | DC          | DC              |
| <b>GABA</b>          | 300.01        | 240.89    | 6.38          | 14.50      | 174.40      | 300.76          | 153.31      | 72.01           | 175.86      | 321.81          | 126.79      | 13.94           |
| <b>Dopa</b>          | 1.06          | 1.94      | DC            | 2.00       | 1.45        | 2.04            | DC          | DC              | 2.08        | 1.84            | DC          | DC              |
| <b>Octopamine</b>    | 5.49          | 0.39      | BLQ           | BLQ        | 2.29        | 0.20            | NF          | DC              | 0.65        | 1.11            | NF          | NF              |
| <b>Tyrosine</b>      | 84.26         | 58.49     | 96.41         | 53.93      | 140.86      | 117.51          | DC          | DC              | 147.28      | 136.63          | DC          | 136.63          |
| <b>Dopamine</b>      | 1.12          | 0.28      | 0.13          | 0.46       | 1.00        | 0.62            | 69.17       | 26.02           | 1.06        | 0.83            | 11.59       | 25.18           |
| <b>Serotonin</b>     | 9.33          | 2.25      | 1.92          | 1.35       | 6.06        | 3.39            | 143.62      | 81.14           | 3.59        | 3.72            | 32.70       | 81.37           |
| <b>Tyramine</b>      | 0.08          | BLQ       | 0.05          | 0.06       | 0.10        | 0.05            | 4.06        | 1.73            | 0.07        | 0.05            | 0.90        | 0.22            |
| <b>Tryptophan</b>    | 21.84         | 68.84     | 11.59         | 16.44      | 36.93       | 74.66           | 1230.41     | 1054.85         | 41.40       | 40.70           | 2263.10     | 3650.53         |

\* BLQ= Below Limit of Quantitation

NF= Not Found

DC= Detected but not calculated due to the highly suppressed Internal Standard signal

# Representative UHPLC-MS/SRM chromatogram of Blank:

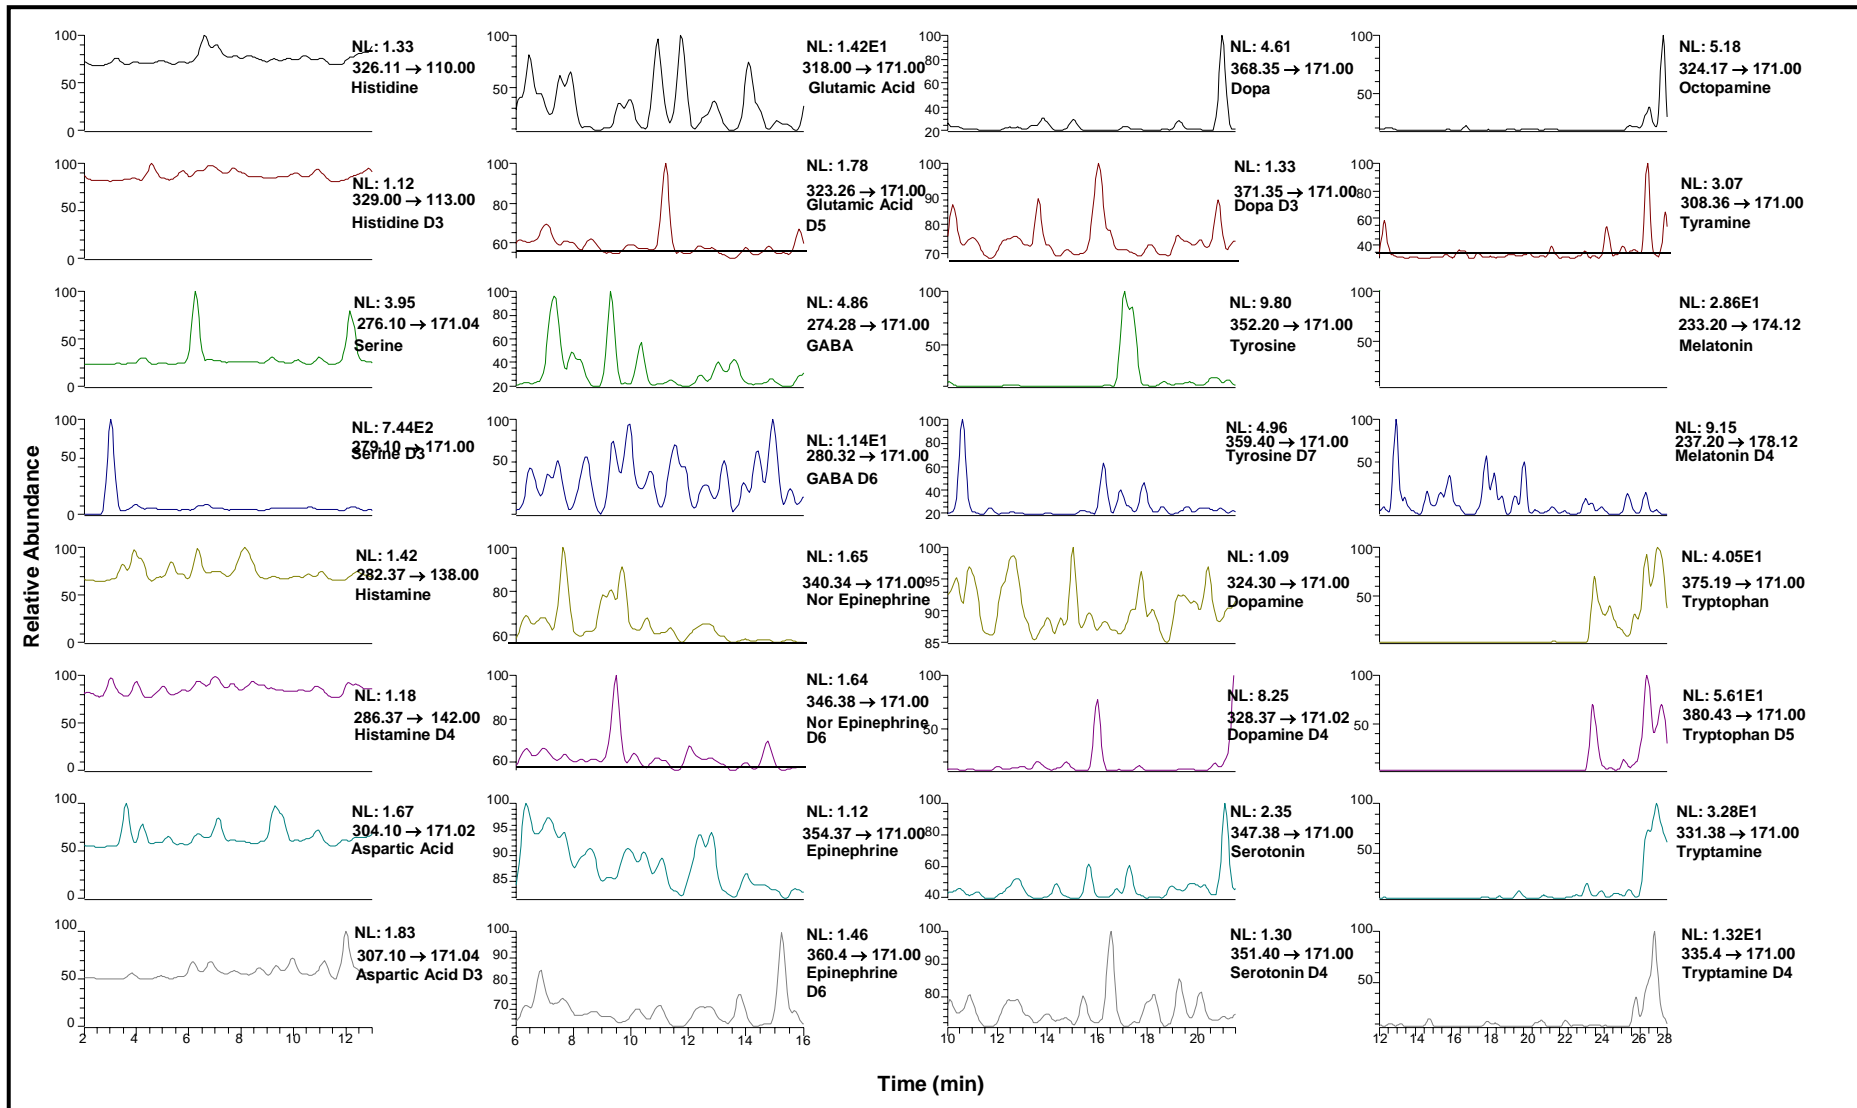

# Representative UHPLC-MS/SRM chromatogram of Standard:

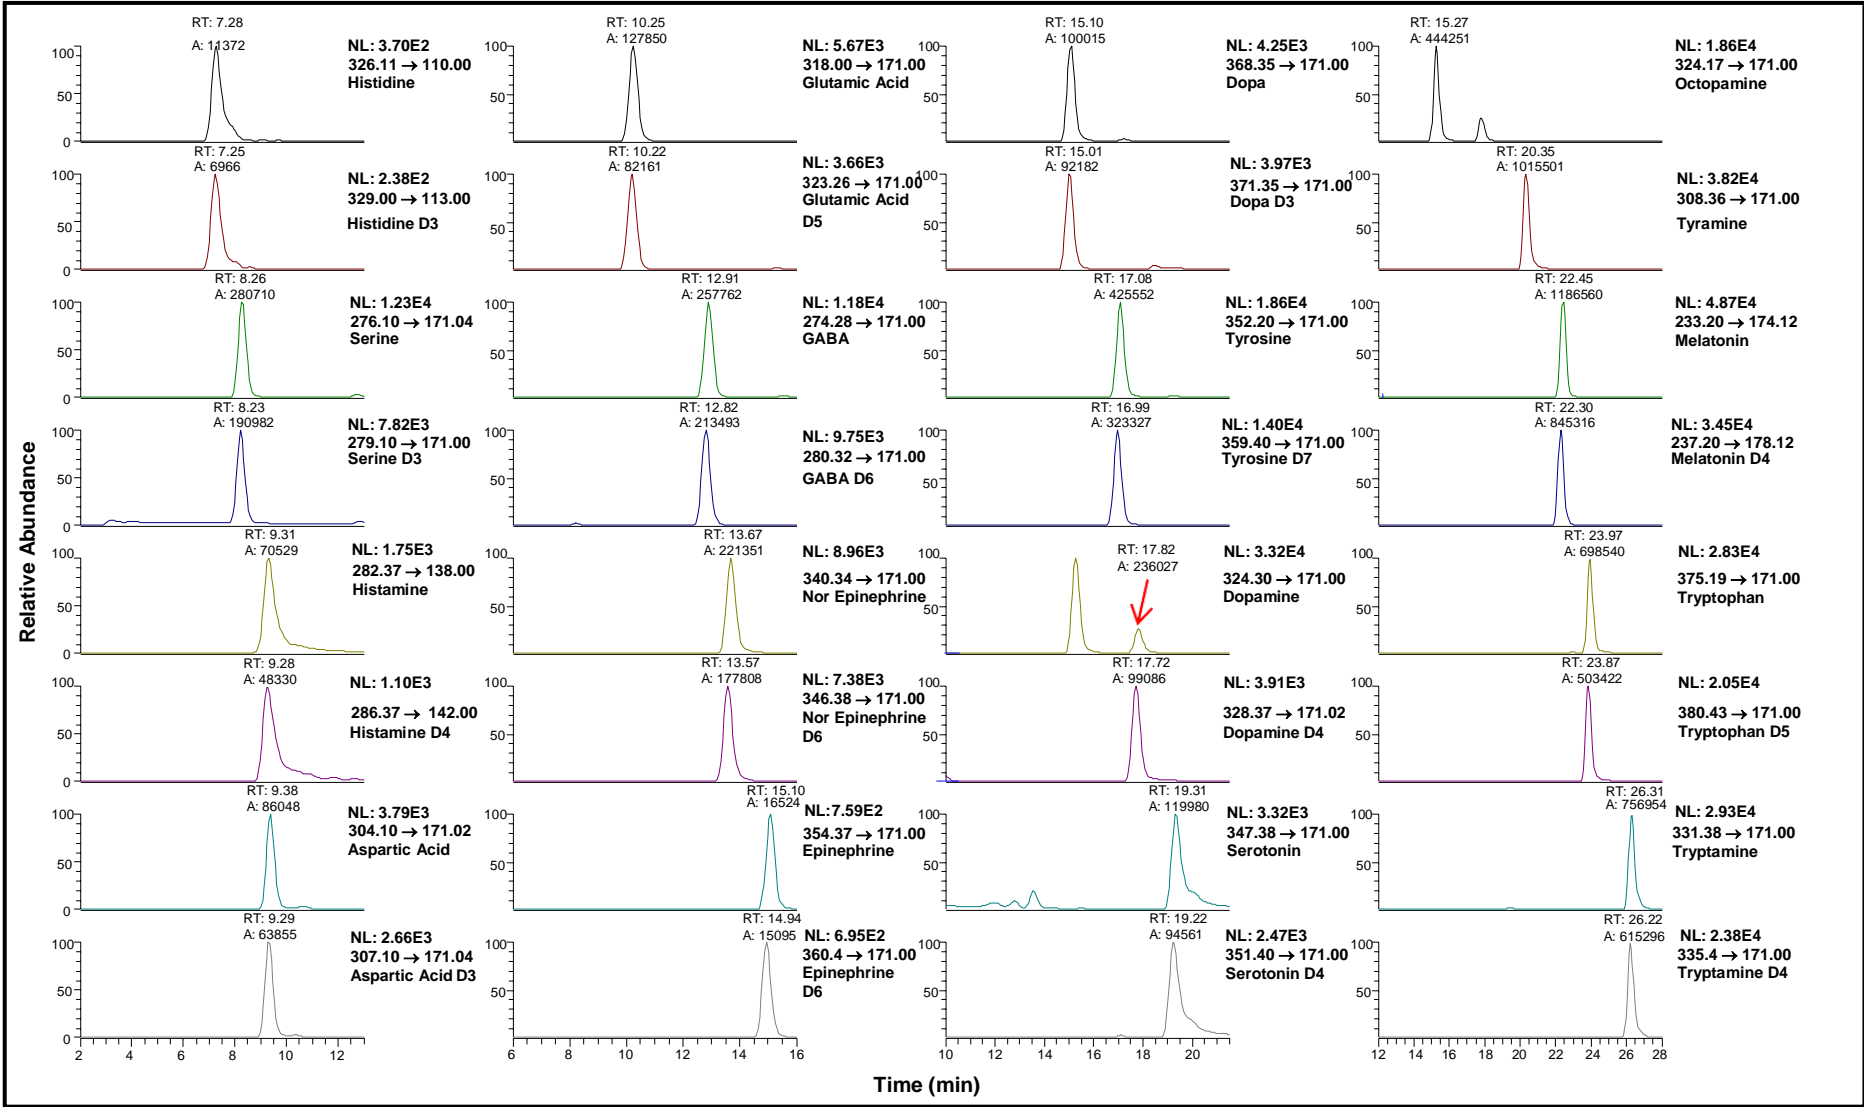

# Representative UHPLC-MS/SRM chromatogram of sample Ac\_SF\_Br:

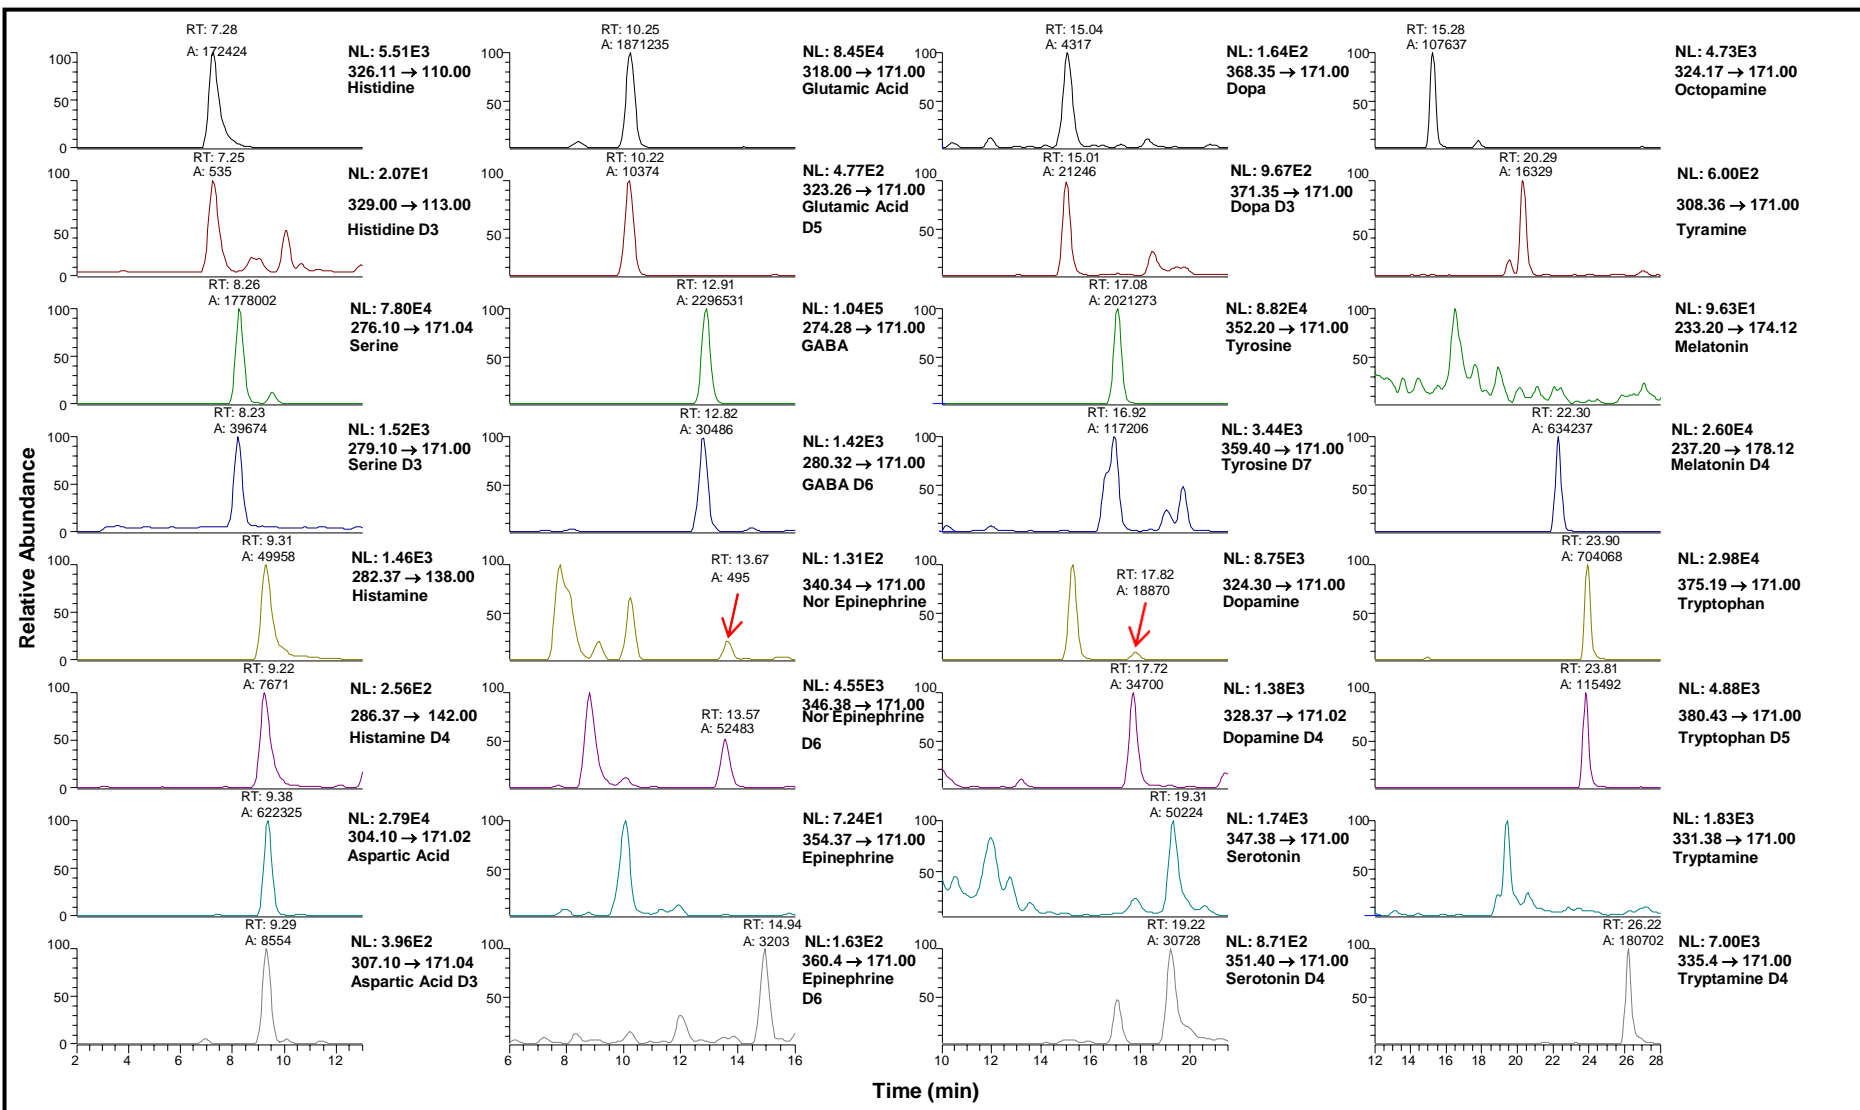

# Representative UHPLC-MS/SRM chromatogram of sample Ac\_SF\_MG:

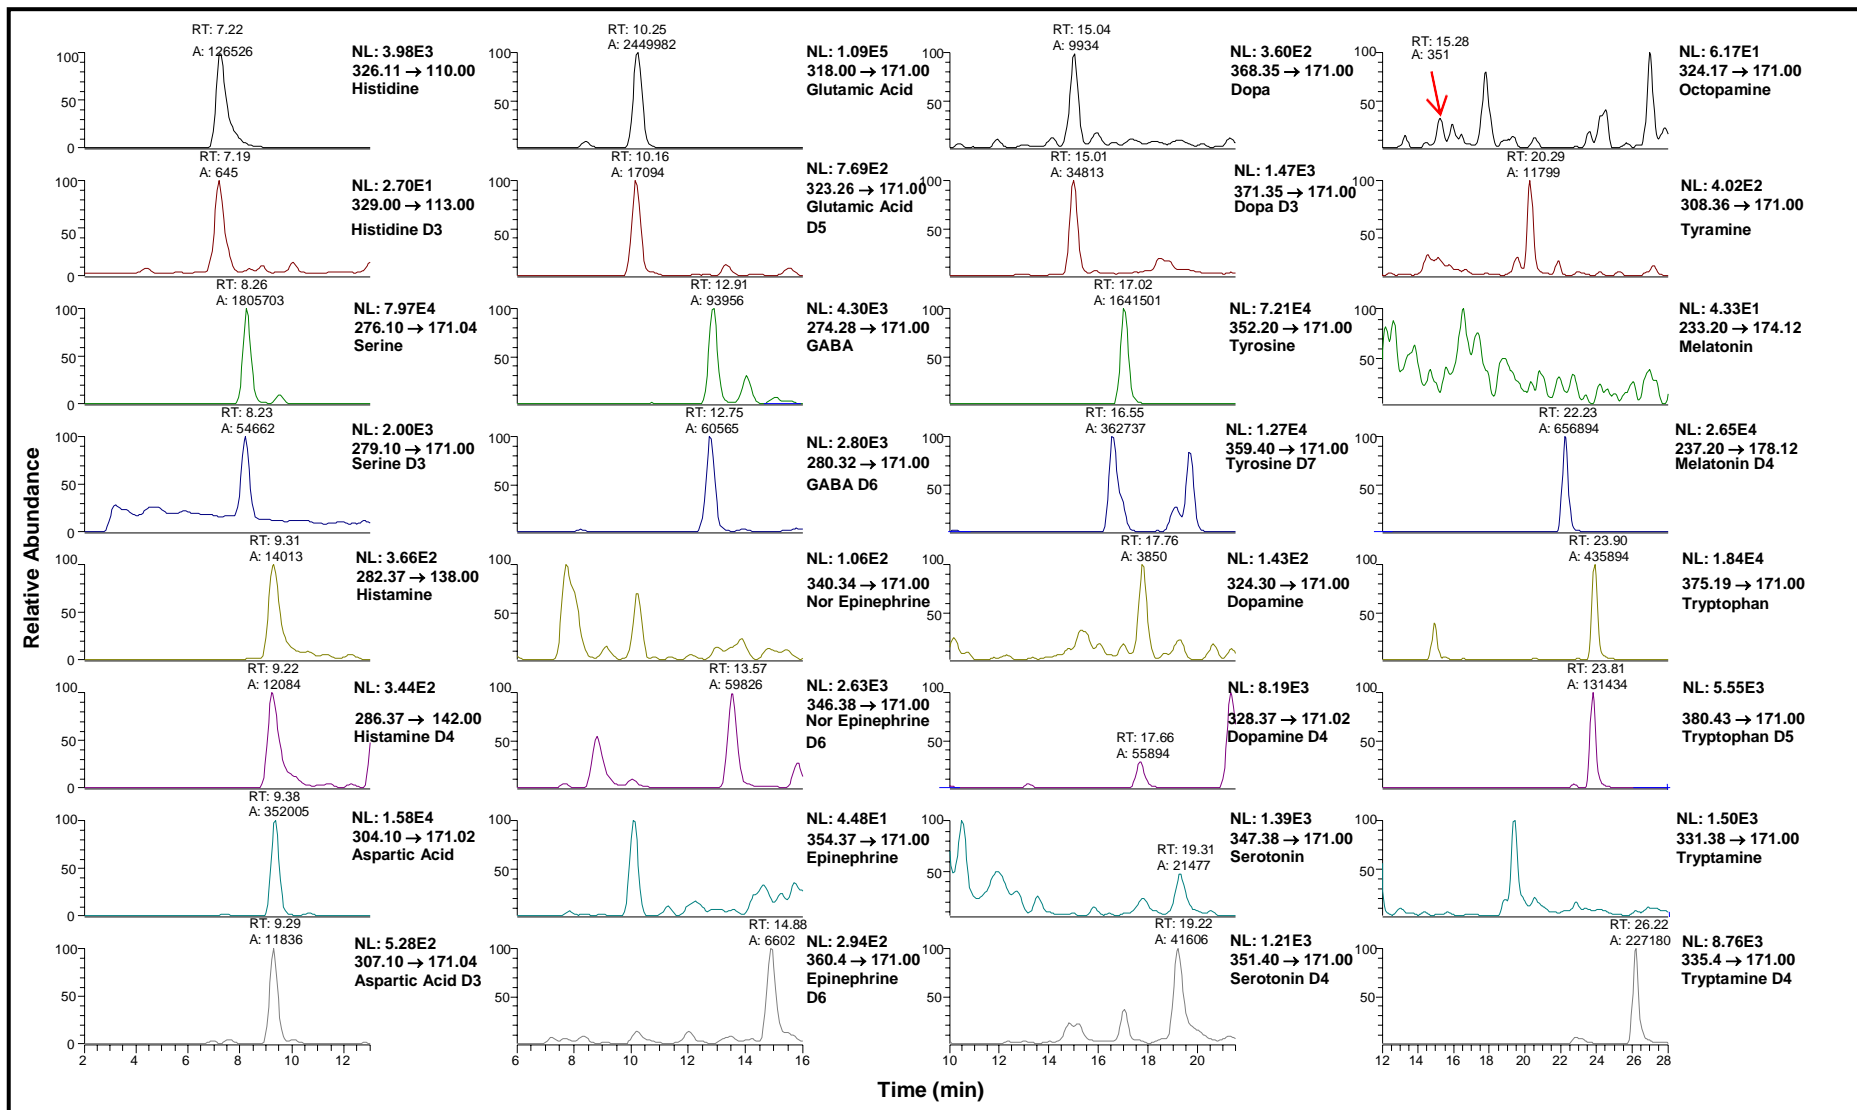

Supplement: Supplementary file [file media-1.pdf]
